# Supplementary material
Source: PubMed Central journal article supplement (PMC6207111)
Supplement: AnnalsATS.201710-787OC_rojas_data_supplement.pdf [file AnnalsATS.201710-787OC_rojas_data_supplement.pdf]

## **Online Data Supplement**

### **Predicting Intensive Care Unit Readmission with Machine Learning Using Electronic Health Record Data**

Juan C. Rojas MD; Kyle A. Carey MPH; Dana P. Edelson MD, MS; Laura R. Venable MS, MPH; Michael D. Howell MD, MPH; Matthew M. Churpek, MD, MPH, PhD

**Table E1:** Variables Utilized in Full and Physiologic Models

| Variable Category                       | Variable                                                                                                                                                                                                                                                                                                                                                                                                                                                                                                                                                                                                                                                                                                                                                                                                                                                                                                         | How Variable Was Modeled |
|-----------------------------------------|------------------------------------------------------------------------------------------------------------------------------------------------------------------------------------------------------------------------------------------------------------------------------------------------------------------------------------------------------------------------------------------------------------------------------------------------------------------------------------------------------------------------------------------------------------------------------------------------------------------------------------------------------------------------------------------------------------------------------------------------------------------------------------------------------------------------------------------------------------------------------------------------------------------|--------------------------|
| <b>Patient Characteristics</b>          | Admission Source prior to ICU admission                                                                                                                                                                                                                                                                                                                                                                                                                                                                                                                                                                                                                                                                                                                                                                                                                                                                          | Categorical              |
|                                         | Admitted to Medical ICU                                                                                                                                                                                                                                                                                                                                                                                                                                                                                                                                                                                                                                                                                                                                                                                                                                                                                          | Binary                   |
|                                         | Age <sup>***</sup> , Length of Stay in the ICU (hours), Time of ICU Discharge (24-hour military time), Time of ICU Discharge (24-hour military time)                                                                                                                                                                                                                                                                                                                                                                                                                                                                                                                                                                                                                                                                                                                                                             | Continuous               |
| <b>Vital Signs<sup>***</sup></b>        | Pulse (current, 24-hour maximum, 24-hour slope), Diastolic Blood Pressure (current, 24-hour minimum, 24-hour slope), Systolic Blood Pressure (current, 24-hour minimum, 24-hour slope), Respiratory Rate (current, 24-hour maximum, 24-hour SD), Oxygen Saturation (current, 24-hour minimum), Fraction of Inspired Oxygen (current, 24-hour maximum), SpO <sub>2</sub> /FiO <sub>2</sub> (SF) ratio (current, 24-hour slope), Glasgow Coma Scale (current), Urine Output (24-hour sum)                                                                                                                                                                                                                                                                                                                                                                                                                          | Continuous               |
| <b>Laboratory Results<sup>***</sup></b> | Sodium (current), Potassium (current), Bicarbonate (current), Creatinine (current) Creatinine (maximum during ICU admission), Blood Urea Nitrogen (current), Glucose (current), White Blood Cell (current), Platelet (current), Hemoglobin (current, minimum during ICU admission), Total Bilirubin (current), Aspartate aminotransferase (current), Alanine aminotransferase (current), INR (current), PTT (current), BUN/Cr Ratio(current), Ketones (current, maximum during ICU admission), Lactic Acid (current, maximum during ICU admission), Troponin (current, maximum during ICU admission), pH (current, minimum during ICU admission), PaO <sub>2</sub> (current, minimum during ICU admission), PaCO <sub>2</sub> (current, maximum during ICU admission), Change from last collected value of Creatinine, Change from last collected value of BUN, Change from last collected value of BUN/Cr ratio | Continuous               |
| <b>ICU Interventions</b>                | Ventilator (during ICU admission, during last 48 hours of ICU admission), Dialysis (during ICU admission, during last 48 hours of ICU admission), Bi-level Positive Airway Pressure (during ICU admission, during last 48 hours ICU admission), High Flow Nasal Cannula (during ICU admission, during last 48 hours ICU admission), Continuous positive airway pressure (during ICU admission), Cardiac arrest any time prior to ICU discharge, Surgery done in OR any time prior to ICU discharge, Left ventricular assist device, Foley present at time of ICU discharge                                                                                                                                                                                                                                                                                                                                       | Binary                   |
|                                         | Transfusions with pRBC (during ICU admission). Transfusions with FFP (during ICU admission), Transfusions of Platelets (during ICU admission), Transfusions of Cryoprecipitate (during ICU admission), Number of ICU Interventions Performed (during last 48 hours of ICU admission)                                                                                                                                                                                                                                                                                                                                                                                                                                                                                                                                                                                                                             | Continuous               |
| <b>Medications</b>                      | IV Sedation (during ICU admission, during last 48 hours of ICU admission), IV Benzodiazepines (during last 48 hours of ICU admission), Vasoactive (during ICU admission), Inotrope (during ICU admission, during last 48 hours of ICU admission), Nebulized albuterol (during ICU admission), IV Anti-psychotics (during ICU admission, during last 48 hours of ICU admission), IV steroids (during ICU admission, during last 48 hours of ICU admission), PO steroids (during ICU admission, during last 48 hours of ICU admission),                                                                                                                                                                                                                                                                                                                                                                            | Binary                   |

|                                         |                                                                                                                                                                                                                                                                                                                                                                                                                                                                                                                                                                                                                                                                                                                                                                                                                                                                   |            |
|-----------------------------------------|-------------------------------------------------------------------------------------------------------------------------------------------------------------------------------------------------------------------------------------------------------------------------------------------------------------------------------------------------------------------------------------------------------------------------------------------------------------------------------------------------------------------------------------------------------------------------------------------------------------------------------------------------------------------------------------------------------------------------------------------------------------------------------------------------------------------------------------------------------------------|------------|
|                                         | PO immunosuppression (during ICU admission, during last 48 hours of ICU admission) IV immunosuppression (during ICU admission, during last 48 hours of ICU admission), IV Insulin drip (during ICU admission), IV diuretic (during last 48 hours of ICU admission), IV AV-Nodal blocking agent (during last 48 hours prior to discharge), IV antiarrhythmic (during last 48 hours of prior to ICU discharge), IV anticoagulation (during last 48 hours prior to ICU discharge), PO anticoagulation (during last 48 hours prior to ICU discharge), Lactulose (during ICU admission, during last 48 hours of ICU admission), IV antibiotics (during ICU admission), PO antibiotics (during ICU admission), IV anti-fungal (during ICU admission), PO anti-fungal (during ICU admission), IV anti-viral (during ICU admission), PO anti-viral (during ICU admission) |            |
|                                         | Number of vasoactive medication (during ICU admission), Nebulized albuterol treatments (during last 48 hours of ICU admission), Number of anti-infective medications (during last 48 hours of ICU admission), Number of crystalloid bolus (during last 48 hours of ICU admission), Number of colloid bolus (during last 48 hour of ICU admission), Number of medications categories patient received (during last 48 hour of ICU admission)                                                                                                                                                                                                                                                                                                                                                                                                                       | Continuous |
| <b>Nursing Assessments</b>              | Morse Mental Status (current), Morse Gait (current), Morse Score (current), Braden Activity (current), Braden Friction Scale (current). Braden Mobility Scale (current). Braden Sensory Scale (current), Braden Scale(current), Nursing Abdominal Physical Exam During Last 48 hours of ICU admission (ascites, abdominal distension, firm abdomen, tender abdomen, rigid abdomen, gravid), Telemetry Rhythm Documented by Nursing Over Last 48 hours of ICU Admission (atrial fibrillation, atrial flutter, paced, SVT, VT, Asystole, Heart Block (I, II, III), junctional)                                                                                                                                                                                                                                                                                      | Binary     |
|                                         | Number of Documented Nurse Oral/Nasal Suctioning Events (during last 48 hours of ICU admission)                                                                                                                                                                                                                                                                                                                                                                                                                                                                                                                                                                                                                                                                                                                                                                   | Continuous |
| <b>Diagnostic Tests*</b>                | ECG, TTE, Chest X-ray, Abdominal X-ray, Right Upper Quadrant Ultrasound, CT Head, CT Chest, CT Neck, CT Abdomen/Pelvis, CT Chest/Abdomen/Pelvis, Blood Culture, Positive Blood Culture                                                                                                                                                                                                                                                                                                                                                                                                                                                                                                                                                                                                                                                                            | Binary     |
|                                         | Number of Diagnostic Tests Ordered (during last 48 hours of ICU admission)                                                                                                                                                                                                                                                                                                                                                                                                                                                                                                                                                                                                                                                                                                                                                                                        | Continuous |
| <b>Elixhauser ICD-9 Code Category**</b> | Congestive heart failure, Valvular disease, Pulmonary circulation disorders. Peripheral Vascular Disease, Hypertension (complicated), Hypertension (uncomplicated), Paralysis. Other neurological disorders. Chronic pulmonary disease. Diabetes (uncomplicated). Diabetes (complicated), Hypothyroidism. Renal failure, Liver disease, Peptic ulcer disease excluding bleeding, AIDS. Lymphoma. Metastatic cancer, Solid tumor without metastasis. Rheumatoid arthritis/ collagen vascular diseases, Coagulopathy, Obesity, Blood loss anemia, Deficiency anemia. Alcohol abuse. Drug abuse, Psychoses. Depression                                                                                                                                                                                                                                               | Binary     |
|                                         | Number of Elixhauser Comorbidities                                                                                                                                                                                                                                                                                                                                                                                                                                                                                                                                                                                                                                                                                                                                                                                                                                | Continuous |

\*All variables in the diagnostic tests category were binary variables that captured if a specific diagnostic test was ordered or resulted in the last 48 prior to ICU discharge

\*\*ICD-9 data was only used for patients who had prior admissions to our hospital not for the index admission.

\*\*\*Variables used in the physiologic model

Abbreviations: ICU=Intensive Care Unit, SpO2=pulse oximeter saturation; FiO2=fraction of inspired oxygen, PaO2=Arterial oxygen partial pressure, PaCO2=Arterial carbon dioxide partial pressure, Bun/Cr=Blood Urea Nitrogen/Creatinine, INR= International Normalized Units, PTT= Partial thromboplastin time, pRBC=Packed Red Blood Cells, FFP=Fresh Frozen Plasma, IV=Intravenous, PO=Oral, ECG=Electrocardiogram, TTE=Transthoracic Echocardiography, CT=Computed Tomography, OR=Operating Room, AIDS= Acquired Immune Deficiency Syndrome

**Table E2:** Comparison of patient treatments and interventions in the intensive care unit by readmission status in the University of Chicago cohort. \*

|                                                                     | <b>Readmitted, n (%)</b><br><b>N=2,834</b> | <b>Not readmitted, n (%)</b><br><b>N=22,051</b> | <b>p-value</b> |
|---------------------------------------------------------------------|--------------------------------------------|-------------------------------------------------|----------------|
| <b>Dialysis, yes</b>                                                | 443 (16)                                   | 1,648 (7)                                       | <0.0001        |
| <b>Vasopressors, yes</b>                                            | 578 (20)                                   | 2,803 (13)                                      | <0.0001        |
| <b>Intravenous sedation, yes</b>                                    | 785 (28)                                   | 4,571 (21)                                      | <0.0001        |
| <b>Noninvasive Ventilation, yes</b>                                 | 282 (10)                                   | 1,597 (7)                                       | <0.0001        |
| <b>High flow nasal cannula, yes</b>                                 | 86 (3)                                     | 386 (2)                                         | <0.0001        |
| <b>Vasopressors, yes</b>                                            | 578 (20)                                   | 2,803 (13)                                      | <0.0001        |
| <b>Cardiac arrest at any time prior to ICU discharge, yes</b>       | 44 (2)                                     | 4,571 (21)                                      | <0.0001        |
| <b>Surgery at any time prior to ICU discharge, yes</b>              | 879 (31)                                   | 8,448 (38)                                      | <0.0001        |
| <b>Number of Current Anti-Infectives* *at time of ICU discharge</b> |                                            |                                                 | <0.0001        |
| 0                                                                   | 821 (29)                                   | 8,722 (40)                                      |                |
| 1-2                                                                 | 1,001 (35)                                 | 9,017 (41)                                      |                |
| 3+                                                                  | 1,012 (36)                                 | 4,312 (20)                                      |                |
| <b>Diuretics in last 48 hrs, yes</b>                                | 797 (28)                                   | 4,897 (22)                                      | <0.0001        |
| <b>Transfusion of packed red bloods cells</b>                       |                                            |                                                 | <0.0001        |
| None                                                                | 2,467 (87)                                 | 20,524 (93)                                     |                |
| 1-5                                                                 | 299 (11)                                   | 1,249 (6)                                       |                |
| 5-9                                                                 | 56 (2)                                     | 206 (1)                                         |                |

|                                           |            |             |         |
|-------------------------------------------|------------|-------------|---------|
| 10+                                       | 12 (0)     | 72 (0)      |         |
| <b>Transfusion of platelets</b>           |            |             | <0.0001 |
| None                                      | 2,364 (83) | 20,201 (92) |         |
| 1-5                                       | 359 (13)   | 1,647 (7)   |         |
| 5-9                                       | 65 (2)     | 130 (1)     |         |
| 10+                                       | 46 (2)     | 73 (0)      |         |
| <b>Transfusion of fresh frozen plasma</b> |            |             | <0.0001 |
| None                                      | 2,235(79)  | 19,411 (88) |         |
| 1-5                                       | 496 (18)   | 2,342 (11)  |         |
| 5-9                                       | 62 (2)     | 222 (1)     |         |
| 10+                                       | 41 (1)     | 76 (0)      |         |

\*Data presented as n (%) unless otherwise noted.

\*\*Anti-infectives were defined broadly as treatment dose antibiotic, antiviral, and antifungals medications.

Abbreviations: ICU= Intensive Care Unit

**Table E3:** Risk score comparisons of sensitivity, specificity, and area under the receiver operating characteristic curve (AUC) for the different readmission models to the newly derived machine learning score in the internal validation cohort.

| <b>Model Cut-off</b>       | <b>Sensitivity (%)</b> | <b>Specificity (%)</b> | <b>AUC</b>        |
|----------------------------|------------------------|------------------------|-------------------|
| <b>MEWS</b>                |                        |                        | 0.59 (0.57-0.62)  |
| 3                          | 35                     | 78                     |                   |
| 4                          | 16                     | 92                     |                   |
| 5                          | 8                      | 98                     |                   |
| <b>SWIFT</b>               |                        |                        | 0.65 (0.63- 0.67) |
| 12                         | 47                     | 75                     |                   |
| 16                         | 22                     | 90                     |                   |
| 20                         | 15                     | 95                     |                   |
| <b>Derived (GBM) Score</b> |                        |                        | 0.76 (0.75-0.78)  |
| 0.46                       | 69                     | 65                     |                   |
| 0.54                       | 65                     | 75                     |                   |
| 0.65                       | 49                     | 85                     |                   |
| 0.71                       | 38                     | 90                     |                   |
| 0.77                       | 28                     | 95                     |                   |

Abbreviations: SWIFT = Stability and Workload Index for Transfer; MEWS = Modified Early Warning Score; AUC=Areas Under the Receiver Operating Characteristic Curve

**Table E4:** Area under the curve (AUC) comparisons using stepwise addition of variable categories to predict ICU readmission in the internal validation cohort\*.

| <b>Variable Categories</b>                                                                                                      | <b>AUC</b> |
|---------------------------------------------------------------------------------------------------------------------------------|------------|
| Laboratory                                                                                                                      | 0.72       |
| Laboratory + Vitals                                                                                                             | 0.74       |
| Laboratory + Nursing                                                                                                            | 0.74       |
| Laboratory + Nursing + Vitals                                                                                                   | 0.75       |
| Laboratory + Nursing + Vitals + Medications                                                                                     | 0.75       |
| Laboratory + Nursing + Vitals + Medications +<br>Demographics                                                                   | 0.75       |
| Laboratory + Nursing + Vitals + Medications +<br>Demographics + ICU Interventions                                               | 0.76       |
| Laboratory + Nursing + Vitals + Medications +<br>Demographics + ICU Interventions + Diagnostic Tests                            | 0.76       |
| Laboratory + Nursing + Vitals + Medications +<br>Demographics + ICU Interventions + Diagnostic Tests +<br>Medical Comorbidities | 0.76       |

\*Readmission at any time after ICU discharge

Abbreviations: AUC= area under the receiver operating characteristic curve (AUC)
